# Supplementary material for: Identification of Metabolites and Metabolic Pathways Related to Treatment with Bufei Yishen Formula in a Rat COPD Model Using HPLC Q-TOF/MS
Source: Evid Based Complement Alternat Med. 2015 Jun 15;2015:956750. doi: 10.1155/2015/956750 (PMC4485497; doi:10.1155/2015/956750)
Supplement: Supplementary file 1 — Table S1. The DMs among three rat groups. sheet 1:the DMs between control and COPD groups in 20th week, sheet 2: the DMs between control and COPD groups in 32th week, sheet 3: the DMs between COPD and BYF groups in 20th week, sheet 4: the DMs between COPD and BYF groups in 32th week. [file 956750.f1.xlsx]

## Sheet: Sheet1
the DMs between control and COPD groups(in 20th week)
No.	Name	rt	m/z	VIP(COPD/Control)	ttest P	metabolite	fold(COPD/Control)	control_mean	COPD_mean	Control_F100	Control_F107	Control_F13	Control_F135	Control_F21	Control_F148	Control_F6	Control_F7	COPD_F128	COPD_F20	COPD_F4	COPD_F80	COPD_F82	COPD_F83	COPD_F8
521	M175T44	0.74	175.023	1.24	0.049	Aconitic acid	0.7	0.063	0.318	0.0749386	0.102368	0.034699	0.0704846	0.0936319	0.0338868	0.0402252	0.0545272	0	0.141944	0.0773764	0.835861	0.617701	0.512754	0.0390783
380	M136T49	0.822	136.076	1.48	0.024	phenacylamine	0.17	0.447	0.668	0.44434	0.512274	0.492133	0.432255	0.682283	0.504387	0.290798	0.216966	0.595136	0.975466	0.85741	0.535742	0.640065	0.669963	0.403014
338	M300T269	4.491	300.095	1.21	0.035	8-hydroxy Guanosine	-0.46	0.074	0.025	0.0801527	0.0915813	0.0571467	0.116759	0.129325	0.113763	0	0	0.0282776	0.0231315	0.0380375	0.0564205	0	0	0.0315751
1538	M232T288	4.802	232.154	1.11	0.045	Isobutyryl carnitine	0.46	0.03	0.086	0	0	0	0	0	0	0.140681	0.0958166	0.0306164	0.0454388	0.116141	0.0654343	0.091972	0.119083	0.133314
410	M126T298	4.969	126.022	1.64	0.003	Taurine	0.56	0.066	0.243	0.0597768	0.0921944	0	0	0	0	0.231581	0.145933	0.156735	0.195505	0.31152	0.112379	0.235794	0.26045	0.427246
1088	M214T302	5.026	214.143	1.59	0.01	N-heptanoyl-homoserine lactone	0.46	0.03	0.086	0.0245066	0.0518368	0	0	0	0	0.111064	0.0536276	0.0994131	0.0730294	0.136096	0.0433151	0.0895513	0.0984093	0.063292
1745	M160T303	5.045	160.133	1.33	0.03	2-Aminooctanoic acid	0.4	0.076	0.192	0.0326704	0.0998157	0	0	0	0	0.313659	0.165449	0.122391	0.184605	0.28367	0.156776	0.217089	0.238733	0.140953
97	M165T305	5.08	165.06	1.37	0.019	Phenylpyruvic acid	-0.68	0.118	0.024	0.144822	0.145797	0.0451828	0.281297	0.15941	0.121979	0.013384	0.0285055	0.0790503	0	0.031526	0.0158116	0	0.00712916	0.0371239
1251	M289T307	5.118	289.175	1.6	0.005	2-hydroxyestradiol	0.52	0.051	0.168	0.0210045	0.070912	0	0	0	0	0.189573	0.122764	0.0814531	0.165446	0.143081	0.169219	0.207268	0.2813	0.129043
1084	M174T307	5.12	174.112	1.56	0.007	Acetyl-L-Leucine	0.5	0.031	0.097	0.0213176	0.0363077	0	0	0	0	0.11724	0.0695814	0.0455354	0.0945332	0.143448	0.0610494	0.109997	0.134839	0.0903216
1030	M208T310	5.159	208.096	1.65	0.017	N-Acetyl-L-phenylalanine	0.45	0.015	0.042	0.0159713	0.00673879	0	0.0207096	0	0.00871296	0.0430071	0.0228374	0.0168153	0.0189828	0.0703679	0.0355847	0.0555542	0.0697276	0.0248854
313	M242T310	5.171	242.174	1.61	0.018	N-nonanoyl-L-Homoserine lactone	0.49	0.037	0.115	0.0226536	0.125893	0	0	0	0	0.0965302	0.0513073	0.102308	0.132931	0.245022	0.0766787	0.0925712	0.0657775	0.0873005
529	M271T315	5.245	271.164	1.49	0.01	Estrone	0.48	0.122	0.37	0.0880163	0.17702	0	0	0	0	0.420687	0.291358	0.298573	0.258449	0.705051	0.346567	0.253757	0.340064	0.39082
64	M149T316	5.266	149.045	1.4	0.047	D-α-Hydroxyglutaric acid	0.27	0.036	0.067	0.0621581	0	0.0342325	0.0491816	0.078558	0.0435085	0.0131002	0.00934957	0.0900346	0.109055	0.0555058	0.0512955	0.0573164	0.0780472	0.0289439
505	M303T316	5.267	303.191	1.81	0.001	2-Methoxyestradiol	0.54	0.105	0.363	0.126928	0.0663043	0	0	0	0	0.394926	0.25358	0.306702	0.315825	0.48516	0.27204	0.372394	0.423206	0.366233
196	M165T318	5.292	165.076	1.21	0.024	α-D-Fucose	0.35	0.232	0.514	0.281352	0.525777	0	0	0	0	0.605782	0.444009	0.500642	0.508519	0.740942	0.317826	0.550692	0.545473	0.434639
1312	M165T328	5.461	165.09	1.72	0.011	3-Phenylbutyric acid	0.38	0.251	0.6	0.379069	0.43483	0	0	0	0	0.567094	0.624524	0.863136	0.619023	0.725779	0.447653	0.512865	0.460071	0.572662
736	M205T328	5.467	205.083	1.63	0.022	γ-D-Glutamylglycine	0.42	0.018	0.046	0.0238452	0.0316234	0	0	0	0	0.0339791	0.0517293	0.0890107	0.0549319	0.0417388	0.0438199	0.0247098	0.0248438	0.0437168
395	M367T352	5.861	367.211	1.63	0.011	20-carboxy-LTB4	0.46	0.196	0.57	0.0306853	0.520894	0	0	0	0	0.635217	0.381607	0.739596	0.682384	0.64307	0.223363	0.317161	0.728392	0.655833
495	M369T354	5.9	369.226	2.08	0	20-hydroxy-PGE2	0.63	0.052	0.222	0.00547748	0.0712608	0	0	0	0	0.183653	0.157294	0.191283	0.19748	0.183151	0.222266	0.241377	0.309536	0.209161
1184	M213T362	6.041	213.148	1.48	0.03	7-Oxo-11-dodecenoic acid	0.35	0.086	0.194	0.0868477	0.193395	0	0	0	0	0.244058	0.165591	0.188198	0.116484	0.219401	0.144701	0.156585	0.297074	0.235789
1079	M295T363	6.042	295.227	1.43	0.027	13(S)-HOTrE	0.35	0.484	1.078	0.592405	1.02274	0	0.00483781	0	0	1.33134	0.918526	1.09706	0.73133	1.10391	0.82648	0.839897	1.66451	1.28389
1104	M313T363	6.042	313.237	1.49	0.021	13(S)-HpODE	0.36	0.121	0.28	0.131747	0.26689	0	0	0	0	0.347041	0.223876	0.273503	0.234715	0.242207	0.223932	0.220492	0.429568	0.337622
199	M353T363	6.048	353.23	1.65	0.014	20-hydroxy LTB4	0.36	0.37	0.839	0.670484	1.0238	0.0118399	0	0	0	0.67643	0.577604	0.955669	0.815247	0.807518	0.757475	0.598901	1.04131	0.897368
619	M335T369	6.142	335.221	1.78	0.005	20-carboxy Arachidonic Acid	0.44	0.235	0.654	0.218142	0.502407	0	0	0	0	0.331881	0.830059	0.771429	0.6439	0.838918	0.614297	0.661435	0.627515	0.421405
2240	M333T389	6.485	333.242	1.28	0.038	Leukotriene A4 methyl ester	0.18	0.082	0.126	0.122922	0.111224	0	0.0523784	0.0573677	0.138285	0.0950652	0.082419	0.161047	0.122123	0.135156	0.105437	0.0989914	0.150749	0.110117
68	M367T397	6.621	367.245	1.84	0.004	Prostaglandin E2 methyl ester	0.44	0.225	0.614	0.371621	0.668837	0	0	0	0	0.426189	0.336674	0.706012	0.619172	0.491809	0.520172	0.412088	0.837572	0.709832
1127	M351T401	6.676	351.216	1.9	0.001	Lipoxin A5	0.48	0.483	1.444	0.454174	0.858691	0	0	0	0	1.24416	1.30412	1.73733	1.50847	1.14829	1.16796	1.51036	1.6948	1.34143
994	M331T430	7.161	331.267	1.71	0.005	Eicosapentaenoic Acid ethyl ester	0.48	0.253	0.765	0.227469	0.44384	0	0	0	0	0.853695	0.495486	0.658141	0.702201	0.455927	0.716562	0.663011	1.29389	0.863294
74	M335T455	7.579	335.22	1.78	0.008	20-carboxy Arachidonic Acid	0.41	0.357	0.923	0.582382	0.946795	0	0	0	0	0.755874	0.573702	1.14924	0.853224	0.714403	0.755986	0.541385	1.08367	1.36395
863	M213T466	7.76	213.149	1.89	0.002	7-Oxo-11-dodecenoic acid	0.51	0.106	0.343	0.104047	0.205622	0	0	0	0	0.320842	0.220826	0.308155	0.412173	0.201325	0.302355	0.277705	0.506048	0.392432
2438	M398T484	8.067	398.29	1.21	0.033	PGE1 Ethanolamide	0.56	0.014	0.053	0	0	0	0	0	0	0.0475161	0.0674621	0.0380619	0.0263665	0	0.0475197	0.0706086	0.0981792	0.0880595
1993	M337T492	8.208	337.237	1.51	0.025	11-deoxy-PGE2	0.47	0.043	0.127	0.00943957	0.0478172	0	0	0	0	0.162682	0.127358	0.130381	0.0666166	0.0600303	0.13409	0.126763	0.248515	0.123083
499	M528T505	8.412	528.3	1.25	0.011	LysoPE(22:5)	0.56	0.055	0.198	0.0465317	0.145816	0	0	0	0	0.206915	0.0410607	0.16121	0.119771	0.141349	0.163372	0.100738	0.391474	0.310693
36	M518T527	8.776	518.325	1.37	0.048	LysoPC(18:3)	-0.7	0.061	0.012	0.0541624	0.0305199	0.0732652	0.0708875	0.0248072	0.185765	0	0.0452037	0.025431	0	0	0.0440047	0	0	0.0159743
31	M319T535	8.91	319.225	2.08	0.001	5-HEPE	0.54	0.211	0.734	0.358506	0.332123	0.0204902	0.015501	0	0.0393305	0.499922	0.425624	1.10958	0.862672	0.522734	0.902964	0.493107	0.765748	0.484257
541	M281T535	8.913	281.239	2.04	0	Linoleic acid	0.52	0.317	1.052	0.496149	0.323711	0.0535035	0	0	0.00690277	0.864804	0.794234	1.18875	1.09416	0.840779	1.2068	0.956485	1.31008	0.769458
391	M279T535_1	8.92	279.232	2.1	0	α-Linolenic Acid	0.49	1.839	5.636	2.58528	1.81111	0.346418	0.170237	0.29592	0.267119	4.8402	4.39934	6.37587	5.70333	4.36442	6.50756	5.23931	7.03787	4.22344
117	M333T543	9.048	333.204	1.69	0.012	11β-Hydroxyprogesterone	0.57	0.047	0.175	0.0349978	0.0905782	0	0	0	0	0.135977	0.111747	0.295348	0.116165	0.0560333	0.122646	0.0810491	0.330054	0.225282
372	M311T543	9.057	311.222	1.71	0.01	13(S)-HpOTrE	0.66	0.043	0.199	0.00864492	0.0527717	0	0	0	0	0.163973	0.122206	0.16517	0.164314	0.0520073	0.151866	0.166316	0.468918	0.221583
2163	M277T564	9.398	277.216	1.2	0.004	9,12-Octadecadiynoic Acid	0.44	0.248	0.678	0.275115	0.403285	0	0	0	0	0.752967	0.552964	0.613713	0.605271	0.527528	0.679682	0.635099	1.00768	0.676457
1269	M297T566	9.431	297.235	1.38	0.017	9-HODE	0.51	0.024	0.077	0	0.0164024	0	0	0	0	0.108081	0.0669326	0.0569613	0.0428226	0.0566774	0.0829164	0.075866	0.144627	0.0801422
2554	M305T578	9.633	305.248	1.51	0.038	Arachidonic Acid	0.38	0.045	0.106	0.0810684	0.00687255	0	0	0	0	0.0819932	0.186815	0.100538	0.0989318	0.0882418	0.133486	0.119962	0.112747	0.0867876
709	M321T585	9.757	321.242	1.81	0.007	5-HETE	0.46	0.05	0.144	0.0607319	0.081827	0	0	0	0	0.16608	0.0900248	0.0661785	0.152628	0.0979613	0.154291	0.215474	0.134607	0.184444
984	M338T586	9.768	338.269	1.67	0.016	Linoleoyl glycine	#DIV/0!	0	0.033	0	0	0	0	0	0	0	0	0	0.0447316	0	0.0813063	0.0379735	0.0676212	0
648	M307T606	10.107	307.263	1.58	0.017	Linolenic Acid ethyl ester	0.65	0.015	0.065	0	0	0	0	0	0	0.0554902	0.0617185	0	0.0581761	0.0274261	0.115686	0.106378	0.0961095	0.0510732
194	M322T699	11.655	322.274	1.14	0.028	α-Linolenoyl Ethanolamide	-0.57	0.459	0.123	0.17101	0.106944	1.0296	0.885771	0.375965	0.459329	0.110073	0.530228	0.191607	0.0310505	0.0770521	0.263514	0.158688	0.0310547	0.11087
121	M327T699	11.655	327.23	1.46	0.021	4,5-dehydro Docosahexaenoic Acid	-0.61	0.287	0.07	0.106199	0.0628451	0.621619	0.549927	0.267313	0.275878	0.077757	0.333223	0.115654	0	0.0582813	0.157507	0.0934563	0	0.0661499
409	M285T800	13.328	285.28	1.67	0.011	Stearic acid	-0.29	0.58	0.297	0.552706	0.382438	0.772224	0.626295	0.520729	0.162943	0.773461	0.847054	0.118608	0.423344	0.320731	0.29237	0.323491	0.17197	0.426055

## Sheet: Sheet2
the DMs between control and COPD groups(in 32th week)
No.	Name	rt	m/z	VIP(COPD/Control)	ttest P	metabolite	fold(COPD/Control)	control_mean	COPD_mean	Control_F106	Control_F14	Control_F16	Control_F37	Control_F42	Control_F81	Control_F112	Control_F97	COPD_F11	COPD_F123	COPD_F146	COPD_F19	COPD_F23	COPD_F87	COPD_F62	COPD_F144
2382	M146T35	0.589	146.117	1.64	0.01	Acetylcholine	0.43	0.06	0.15	0.0457004	0.062368	0.0397915	0.0694343	0.119967	0.0295767	0.0589517	0.0390783	0.0137755	0.131825	0.193717	0.138239	0.11125	0.303318	0.112053	0.233857
1112	M310T35	0.589	310.112	1.41	0.01	N-Acetylneuraminic AcidN-Acetylneuraminic Acid	-0.76	0.03	0.01	0.0872809	0.0477282	0.0236373	0.0259041	0.0237843	0.00769553	0.0287987	0.0281877	0	0.0281653	0	0	0	0	0.0115439	0.0077571
2556	M114T36	0.604	114.066	1.43	0.04	Creatinine	0.48	0.06	0.19	0.0720494	0.0930042	0.0802055	0.0839303	0.107553	0	0.0256687	0.0269231	0.517046	0.174401	0.217472	0.134939	0.0568087	0.21668	0.0344242	0.136555
564	M106T38	0.632	106.05	1.12	0.04	L-Serine	-0.22	0.15	0.09	0.162952	0.237697	0.0811883	0.0764339	0.199186	0.179162	0.134931	0.133226	0.0269243	0.140826	0.0866238	0.0636148	0.118515	0.0555546	0.180231	0.0602912
1021	M101T51	0.847	101.024	1.2	0.04	Succinic anhydride	0.45	0.1	0.29	0	0	0.201645	0.102939	0.219446	0.0808851	0.14752	0.0719925	0	0.114231	0.524712	0.261835	0.29648	0.646488	0.126415	0.346126
1811	M153T73	1.218	153.065	1.21	0.04	N-Hydroxymethylnicotinamide	0.36	0.31	0.72	0.329098	0.61191	0.443383	0.507543	0.255897	0	0	0.335614	0.0122432	0.642119	1.05053	0.742548	1.08011	1.40387	0.582155	0.231693
1538	M232T288	4.802	232.154	1.64	0.03	Butyryl-L-carnitine	-1.16	0.07	0	0	0	0	0.0559956	0.163001	0.104042	0.163262	0.0427108	0	0	0.0159556	0	0.0123735	0.00848339	0	0
1084	M174T307	5.12	174.112	1.59	0.04	acetyl-L-leucine	-0.6	0.07	0.02	0	0	0	0.0841406	0.1561	0.117521	0.139017	0.0636191	0	0	0.0357638	0.00803322	0.0292722	0.0339645	0.0178638	0.0145869
1471	M143T310	5.164	143.106	1.59	0.04	2-Octenoic acid	-0.67	0.02	0	0	0	0	0.0211418	0.0397299	0.0465625	0.0362665	0.0136211	0	0	0.0122454	0	0.00687994	0.00661452	0	0.00760637
1769	M301T325	5.409	301.175	1.71	0.02	Adrenosterone	#NUM!	0.02	0	0	0	0	0.00667988	0.0410165	0.052224	0.0387761	0.0276476	0	0	0	0	0	0	0	0
1672	M171T336	5.608	171.149	1.62	0.04	3-Acrylamidopropyl trimethylammonium	0.26	0.1	0.18	0.113943	0.0669418	0.221805	0.0772377	0.0505723	0.140459	0.00811457	0.104182	0.165949	0.0840668	0.173979	0.239926	0.202972	0.0980893	0.315784	0.146354
2636	M316T386	6.44	316.248	1.09	0.03	Decanoyl-L-carnitine	#NUM!	0.03	0	0	0	0	0.0146842	0.0431172	0.0803658	0.0920789	0.0293598	0	0	0	0	0	0	0	0
2502	M321T387	6.447	321.241	1.52	0.04	9-HETE	-1.07	0.01	0	0	0	0	0.0267547	0.0228531	0.0226078	0	0.0164039	0	0	0	0	0.00759574	0	0	0
1628	M617T409	6.811	617.421	1.82	0.01	PA(30:2)	-0.25	0.25	0.14	0.214199	0.263358	0.170287	0.334435	0.193445	0.388039	0.178298	0.256228	0.18207	0.144843	0.104568	0.190609	0.116871	0.0728679	0.228382	0.0748405
1977	M316T438	7.308	316.285	1.75	0.01	6-hydroxysphingosine	-0.63	0.06	0.02	0	0.0613541	0	0.0518782	0.0753517	0.111895	0.123897	0.0922443	0.0481327	0.0292887	0.00840391	0	0	0	0.0353111	0
406	M302T475	7.917	302.306	1.57	0.03	Sphinganine	-0.42	0.26	0.1	0.128819	0.225534	0.150816	0.0944514	0.296182	0.279411	0.298093	0.619181	0.279013	0.0798549	0.0518678	0.0169156	0.0969585	0.0613055	0.15176	0.0643912
584	M452T478	7.965	452.277	1.57	0.03	LysoPE(16:1)	-0.28	0.23	0.12	0.361082	0.350752	0.0788569	0.159824	0.2018	0.19182	0.261341	0.195915	0	0.0339965	0.200848	0.0391767	0.118654	0.21946	0.188386	0.148485
954	M482T555	9.255	482.315	2.07	0	PC(15:0)	-0.82	0.08	0.01	0	0.069203	0.092324	0.0428461	0.141648	0.0373474	0.0945141	0.137007	0	0	0.0339039	0	0.0248343	0.0351538	0	0
735	M502T556	9.26	502.291	1.92	0.01	Glycerophospho-N-Arachidonoyl Ethanolamine	-0.78	0.05	0.01	0	0.0766687	0.0662966	0.0267212	0.0577882	0.0165223	0.0449333	0.106171	0	0	0.0153957	0	0.0330863	0.0176086	0	0
1606	M328T556	9.275	328.285	1.19	0.01	N-palmitoyl alanine	-0.42	0.52	0.2	0.143071	0.492239	0.730347	0.343353	0.764527	0.334535	0.544022	0.808373	0.115069	0.0412106	0.401352	0.0648646	0.288339	0.400025	0.149656	0.106384
818	M532T568	9.468	532.332	1.55	0.03	PC(19:3)	#NUM!	0.03	0	0	0.0830922	0.0830932	0	0.0329228	0	0	0.046434	0	0	0	0	0	0	0	0
953	M339T576	9.6	339.254	1.6	0.03	LTB3	-0.76	0.06	0.01	0	0	0	0.0891932	0.0992334	0.141678	0.0909752	0.0781781	0	0	0	0	0.0159338	0	0.0630993	0.00816207
457	M520T582	9.707	520.34	1.94	0.01	PC(18:2)	0.19	2.56	3.97	2.5968	3.21289	3.09379	3.75806	2.20484	1.58085	1.54383	2.45359	6.64708	3.58468	2.98842	4.06549	3.25178	3.3613	4.49166	3.35252
2422	M611T630	10.496	611.375	1.61	0.03	PG(24:0)	#NUM!	0.19	0	0	0	0	0.0627546	0.187836	0.535493	0.456301	0.267961	0	0	0	0	0	0	0	0
905	M508T642	10.706	508.339	1.68	0.02	LysoPE(20:1)	#NUM!	0.03	0	0	0.0420829	0.0479801	0	0.0323793	0	0.0285754	0.0959084	0	0	0	0	0	0	0	0
1862	M522T666	11.102	522.356	1.96	0	PC(18:1)	-0.25	2.29	1.3	1.38858	2.25375	1.32155	2.3158	2.46403	2.32078	2.99138	3.23178	1.10174	0.66678	1.56157	0.978691	1.36747	1.64358	1.53796	1.51829
1713	M638T682	11.369	638.403	1.5	0.04	PS(25:0)	#NUM!	0.15	0	0	0	0	0.00699305	0.14615	0.361558	0.500572	0.220477	0	0	0	0	0	0	0	0
1780	M403T732	12.192	403.357	1.53	0.04	20-hydroxycholesterol	#NUM!	0.1	0	0	0	0	0.0068853	0.195736	0.0773065	0.312943	0.224165	0	0	0	0	0	0	0	0
821	M279T742	12.37	279.23	1.58	0.02	γ-Linolenic Acid	-0.35	0.1	0.04	0.0365282	0.141074	0.152249	0.0386326	0.110571	0.0359924	0.0934068	0.155827	0.0607376	0.0170121	0.0441473	0.0302668	0.0470216	0.0526123	0.0381402	0.0492467
771	M305T752	12.531	305.245	1.72	0.02	Arachidonic Acid	0.49	0.05	0.17	0.152056	0	0.0466675	0	0.0604963	0.0718116	0.0745983	0.0260973	0.0349048	0.2843	0.154808	0.0532629	0.30262	0.0823209	0.172436	0.242982
598	M300T752	12.533	300.29	1.64	0.02	Sphingosine	-0.46	0.18	0.06	0.0391499	0.358869	0.141619	0.076696	0.225075	0.134552	0.141223	0.332791	0.169736	0	0.0352842	0	0.098631	0.0638385	0.122321	0.00907216
2292	M283T752	12.535	283.312	1.49	0.03	Stearic acid	-1.12	0.07	0.01	0	0.162054	0.0465134	0	0.0822419	0	0.0565714	0.187813	0.0402625	0	0	0	0	0	0	0
556	M283T753_1	12.554	283.264	1.81	0.01	Oleic Acid	-0.4	1.98	0.8	0.497055	3.05223	2.31844	0.747132	2.70635	1.35042	1.7583	3.39321	1.47266	0.287837	0.816229	0.363862	0.935442	0.839899	1.08542	0.566998
506	M309T766	12.759	309.279	1.57	0.03	Linoleic Acid ethyl ester	-1.46	0.04	0	0	0.11642	0.0813691	0	0.0321228	0	0.0148152	0.0719577	0.010894	0	0	0	0	0	0	0
455	M359T772	12.871	359.316	1.47	0.04	Hexadecyl Acetyl Glycerol	-0.6	0.31	0.08	0.0222124	0.48202	0.280567	0.0893577	0.316641	0.176033	0.223588	0.927967	0.0657105	0	0.0627812	0.0183415	0.211296	0.0415417	0.236272	0
914	M271T772	12.875	271.263	1.61	0.03	Palmitic Acid methyl ester	#NUM!	0.01	0	0	0.0159134	0.0139309	0	0.0180253	0	0	0.0262441	0	0	0	0	0	0	0	0
452	M256T779	12.981	256.264	2.02	0	Palmitic amide	-0.75	0.05	0.01	0	0.100309	0.0744056	0.0280014	0.0393106	0.0610405	0.066776	0.0464103	0	0	0	0.0224454	0.0214746	0	0.0309	0
2055	M403T810	13.501	403.348	1.63	0.03	25-hydroxy-cholesterol	-0.8	0.75	0.12	0.037335	0.0436896	0	0.292059	1.13085	1.20526	1.56873	1.70772	0.0726699	0	0.189803	0	0.373799	0.175969	0.104907	0.0253149
530	M329T810	13.502	329.305	1.6	0.03	2-hydroxy-eicosanoic acid	-0.57	0.16	0.04	0	0.240678	0.11797	0.0386923	0.226623	0.0944898	0.208029	0.343278	0.209081	0	0.026292	0	0.0625137	0	0.0450692	0
1823	M401T848	14.14	401.342	1.65	0.02	25-hydroxyvitamin D3	-1.22	0.28	0.02	0	0	0	0.0766365	0.457232	0.481197	0.569568	0.689036	0	0	0.0233205	0	0.113813	0	0	0

## Sheet: Sheet3
the DMs between COPD and BYF groups(in 20th week)
No.	Name	rt	m/z	VIP(BYF/COPD)	ttest_P	metabolite	fold(BYF/COPD)	COPD	BYF	COPD_F125	COPD_F128	COPD_F20	COPD_F4	COPD_F80	COPD_F82	COPD_F83	COPD_F8	BYF_F119	BYF_F12	BYF_F152	BYF_F154	BYF_F5	BYF_F66	BYF_F127	BYF_F70
2299	M355T526	8.759	355.284	2.08	0.01	2-Linoleoyl Glycerol	-0.99	0.04	0	0.0263959	0	0.0613479	0.0274647	0.0441416	0.0452062	0.112722	0.0324449	0	0.0195333	0	0	0	0.016113	0	0
709	M321T585	9.757	321.242	1.73	0.03	15-HETE	-0.3	0.16	0.08	0.234681	0.0661785	0.152628	0.0979613	0.154291	0.215474	0.134607	0.184444	0.0368293	0.133675	0.0719381	0	0	0.153556	0.0376315	0.181234
2336	M367T460	7.669	367.248	2.03	0.01	15R-PGE2 methyl ester	-0.48	0.11	0.04	0.0754104	0.0485063	0.0745814	0.0982488	0.138985	0.103894	0.205268	0.152	0	0.101584	0.0119675	0	0	0.0515384	0.0275066	0.106724
1542	M427T351	5.851	427.266	1.87	0.02	1-glyceryl-PGE2	-0.28	0.1	0.05	0.123156	0.0898872	0.089257	0.102558	0.122308	0.0848192	0.116719	0.101551	0	0.0954306	0.0734683	0	0	0.0676023	0.0670478	0.128987
730	M182T49_1	0.821	182.12	1.85	0.02	2-(3,4-dimethoxyphenyl)ethanamine	-0.15	0.29	0.2	0.285679	0.282324	0.392554	0.354315	0.251	0.275275	0.306736	0.156449	0.231795	0.142518	0.233575	0.20609	0.123503	0.170243	0.25786	0.265787
2534	M194T292	4.869	194.081	1.72	0.03	2/3-Methylhippuric acid	0.26	0.04	0.08	0.0344462	0.0453113	0.0645306	0.0618299	0.0417496	0.0519531	0.0135691	0.0302696	0.150849	0.0824988	0.0911373	0.0777186	0.0611055	0.0247809	0.0867734	0.0481788
495	M369T354	5.9	369.226	2.27	0	20-hydroxy-PGE2	-0.41	0.21	0.08	0.135714	0.191283	0.19748	0.183151	0.222266	0.241377	0.309536	0.209161	0	0.150365	0.1563	0	0	0.11794	0.0457693	0.188932
1251	M289T307	5.118	289.175	2.36	0	2-hydroxyestradiol	-0.68	0.15	0.03	0.0560455	0.0814531	0.165446	0.143081	0.169219	0.207268	0.2813	0.129043	0	0.110508	0.0228328	0	0	0.0389054	0.00613824	0.0794464
505	M303T316	5.267	303.191	2.14	0.004	2-Methoxyestradiol	-0.44	0.34	0.12	0.138882	0.306702	0.315825	0.48516	0.27204	0.372394	0.423206	0.366233	0	0.337797	0.190481	0	0	0.0429322	0.076008	0.315879
105	M147T317	5.29	147.065	1.63	0.04	3-Methylglutaric acid	0.25	0.03	0.05	0.0355675	0.051725	0	0.0463989	0.0559463	0.00634459	0.00952093	0.0398107	0.0451767	0.0236045	0.0605046	0.0707087	0.0931708	0.0434422	0.0415891	0.0616578
820	M319T482	8.038	319.227	1.73	0.03	5-HEPE	-0.3	0.33	0.17	0.525649	0.379056	0.230967	0.191772	0.325521	0.253342	0.259908	0.469101	0.0933796	0.104615	0.378612	0	0	0.24877	0.145409	0.356849
863	M213T466	7.76	213.149	1.93	0.01	7-Oxo-11-dodecenoic acid	-0.34	0.33	0.15	0.23905	0.308155	0.412173	0.201325	0.302355	0.277705	0.506048	0.392432	0.010834	0.242714	0.309077	0	0	0.222651	0.0813968	0.341099
855	M295T429	7.152	295.227	1.83	0.02	9(S)-HOTrE	-0.32	0.63	0.3	0.391436	0.599137	0.561049	0.535202	0.543786	0.545779	1.06059	0.818556	0	0.532761	0.54169	0	0	0.380438	0.263988	0.708538
70	M295T458	7.63	295.227	2.07	0.01	9-HpODE	-0.39	1.36	0.55	1.7784	1.45076	0.894122	1.07693	0.986539	0.826208	1.75762	2.08354	0.0702017	0.955763	0.994198	0	0	0.554141	0.448482	1.38301
1414	M293T650	10.826	293.212	1.82	0.02	9-OxoOTrE	-0.4	0.08	0.03	0	0.0735542	0.0730565	0.103954	0.0622325	0.0869769	0.157422	0.0920446	0	0.0567161	0.0391597	0	0	0.0680609	0.0299004	0.0626473
793	M252T299	4.986	252.127	2.17	0.003	acetyl tyrosine ethyl ester	-0.43	0.04	0.02	0.0380223	0.0445288	0.0398403	0.0702022	0.0299424	0.0373545	0.0374235	0.0253536	0	0.0317448	0.0286314	0	0	0.00744833	0.018247	0.0350907
1084	M174T307	5.12	174.112	1.99	0.01	Acetyl-L-Leucine	-0.48	0.09	0.03	0.0303745	0.0455354	0.0945332	0.143448	0.0610494	0.109997	0.134839	0.0903216	0	0.101003	0.0338528	0	0	0.0190845	0.014506	0.0692572
1769	M301T325	5.409	301.175	1.7	0.03	Adrenosterone	-0.72	0.03	0.01	0	0	0.0115326	0.0525049	0.0344573	0.051224	0.0711906	0.0281595	0	0.0402027	0	0	0	0	0	0.00757285
2554	M305T578	9.633	305.248	1.96	0.01	Arachidonic Acid	-0.38	0.11	0.05	0.155143	0.100538	0.0989318	0.0882418	0.133486	0.119962	0.112747	0.0867876	0	0.00461074	0.162317	0	0	0.0876413	0.0437209	0.0709074
994	M331T430	7.161	331.267	1.93	0.01	Eicosapentaenoic Acid ethyl ester	-0.34	0.73	0.33	0.519325	0.658141	0.702201	0.455927	0.716562	0.663011	1.29389	0.863294	0.0336208	0.528333	0.631507	0	0	0.512208	0.2235	0.729977
1848	M173T45	0.753	173.092	1.86	0.02	Glycylproline	-0.62	0.04	0.01	0.00798701	0.0154074	0.0710675	0.0473152	0.0222313	0.0441166	0.0747728	0.0263968	0	0.0346199	0	0.0403951	0	0	0	0
1070	M137T51_1	0.851	137.046	1.84	0.02	Hypoxanthine	0.41	5.85	14.97	1.88856	3.22815	10.7598	8.48896	3.23213	7.04378	3.55418	8.60119	11.4009	12.4336	3.21924	27.6362	17.7783	6.96891	28.4436	11.8531
1396	M188T207	3.442	188.071	1.94	0.01	Indoleacrylic acid	-0.52	1.91	0.58	3.06526	0	1.86762	3.25479	2.16634	1.71454	1.496	1.69442	1.58962	0	0	0	1.34889	1.7187	0	0
2492	M156T31	0.51	156.076	2.18	0.003	L-Histidine	-0.32	0.14	0.07	0.21983	0.153202	0.151043	0.145176	0.102765	0.0907807	0.119332	0.103455	0.0505119	0.0563373	0.0489358	0.148525	0.0349466	0.0915512	0.043267	0.0469025
852	M281T556	9.268	281.248	2.09	0.01	Linoleic acid	-0.39	0.23	0.09	0.156109	0.211682	0.257423	0.180157	0.193732	0.193175	0.410604	0.203206	0	0.159353	0.171046	0	0	0.112247	0.107064	0.190435
126	M307T700	11.66	307.254	1.22	0.03	Linolenic Acid ethyl ester	0.86	0	0.02	0	0.006555	0	0	0.0113011	0	0	0	0.0407579	0	0.0238458	0.00504035	0.00703006	0.034572	0.0180484	0
82	M351T485	8.089	351.216	2.09	0.01	Lipoxin A5	-0.38	0.16	0.07	0.20809	0.137447	0.192257	0.0953783	0.143289	0.166081	0.217777	0.122712	0	0.0805508	0.15948	0	0	0.100834	0.0353561	0.155969
1993	M337T492	8.208	337.237	2.35	0	LTB4	-0.64	0.12	0.03	0.108569	0.130381	0.0666166	0.0600303	0.13409	0.126763	0.248515	0.123083	0	0.0246906	0.0715982	0	0	0.0661819	0.0134684	0.0542904
1413	M205T207	3.444	205.097	1.96	0.01	L-Tryptophan	-0.52	3.38	1.02	5.66948	0	3.36815	5.35766	3.70244	3.25618	2.83736	2.83038	2.8798	0	0	0	2.21759	3.10132	0	0
1745	M160T303	5.045	160.133	1.98	0.01	methacholine	-0.38	0.18	0.07	0.0851441	0.122391	0.184605	0.28367	0.156776	0.217089	0.238733	0.140953	0	0.190577	0.112476	0	0	0.0703287	0.0658658	0.153329
1030	M208T310	5.159	208.096	1.95	0.01	N-Acetyl-L-phenylalanine	-0.5	0.04	0.01	0.0514417	0.0168153	0.0189828	0.0703679	0.0355847	0.0555542	0.0697276	0.0248854	0	0.0429479	0.0255948	0	0	0	0.00616709	0.034518
1088	M214T302	5.026	214.143	2.03	0.01	N-heptanoyl-homoserine lactone	-0.45	0.08	0.03	0.0466799	0.0994131	0.0730294	0.136096	0.0433151	0.0895513	0.0984093	0.063292	0	0.0874674	0.0132933	0	0	0.0220081	0.0251098	0.0821874
313	M242T310	5.171	242.174	1.92	0.01	N-nonanoyl-L-Homoserine lactone	-0.41	0.11	0.04	0.116618	0.102308	0.132931	0.245022	0.0766787	0.0925712	0.0657775	0.0873005	0	0.0889748	0.0400556	0	0	0.0574081	0.071159	0.0985645
1984	M351T511	8.517	351.253	2.29	0	PGA1 methyl ester	-0.44	0.2	0.07	0.208622	0.119999	0.142337	0.155183	0.234374	0.268111	0.281408	0.197882	0	0.145029	0.0789969	0	0	0.142112	0.053538	0.166728
1333	M353T460	7.659	353.233	1.83	0.02	PGE2	-0.49	0.11	0.04	0.032987	0.0588955	0.0919179	0.066777	0.0768083	0.186161	0.223027	0.150952	0	0.0726315	0.106067	0	0	0.0705187	0	0.0393763
2151	M369T521	8.691	369.265	2.15	0	PGF2α methyl ester	-0.53	0.11	0.03	0.0759911	0.0302945	0.0636856	0.151856	0.124858	0.147697	0.171867	0.123675	0	0.0960253	0	0	0	0.0650374	0.0228204	0.0782949
97	M165T305	5.08	165.06	1.48	0.03	Phenylpyruvic acid	0.6	0.03	0.1	0.038898	0.0790503	0	0.031526	0.0158116	0	0.00712916	0.0371239	0.0794829	0.0245682	0.118902	0.153247	0.290363	0.0179311	0.0571657	0.0955568
1123	M214T362	6.041	214.151	1.68	0.04	Propenyl-L-NIO	-0.26	0.63	0.35	0.497281	0.628181	0.519464	0.560281	0.534131	0.539071	0.909494	0.815446	0.0171628	0.583424	0.575902	0	0.00825076	0.386419	0.381205	0.816318
2438	M398T484	8.067	398.29	1.93	0.01	Prostaglandin E1 Ethanolamide	-0.87	0.05	0.01	0	0.0380619	0.0263665	0	0.0475197	0.0706086	0.0981792	0.0880595	0	0	0.0265683	0	0	0.0228477	0	0
1933	M395T526	8.768	395.277	2.29	0	Prostaglandin E2 isopropyl ester	-0.67	0.07	0.02	0.0773205	0	0.093688	0.107658	0.0772305	0.0462273	0.123114	0.0682063	0	0.0426047	0	0	0	0.0288113	0.0229156	0.0329943
1793	M170T153	2.55	170.081	1.63	0.04	Pyridoxine	-0.51	0.35	0.11	0.324778	0.494111	0.207562	0.591041	0.0747365	0.0898208	0.201938	0.785059	0	0.386395	0	0	0	0	0.123777	0.337123
1386	M113T70	1.174	113.06	2.01	0.01	Sorbic acid	#NUM!	0.03	0	0.0092309	0	0.0447875	0.0337426	0	0.0594631	0.0461578	0.0101087	0	0	0	0	0	0	0	0
2163	M277T564	9.398	277.216	1.49	0.01	Stearidonic Acid	-0.32	0.66	0.31	0.511767	0.613713	0.605271	0.527528	0.679682	0.635099	1.00768	0.676457	0.0166326	0.366039	0.58511	0	0	0.441369	0.298307	0.808577
196	M165T318	5.292	165.076	1.61	0.03	α-D-Fucose	-0.27	0.5	0.27	0.372054	0.500642	0.508519	0.740942	0.317826	0.550692	0.545473	0.434639	0	0.629291	0.378266	0	0	0.281647	0.348709	0.488224
2076	M273T318	5.298	273.18	1.98	0.01	β-estradiol	-0.51	0.09	0.03	0.0572195	0.10668	0.0904938	0.183009	0.0274256	0.0985476	0.0805027	0.0551028	0	0.0851388	0.0276939	0	0	0.0155484	0.0230438	0.0668994
391	M279T535_1	8.92	279.232	1.92	0.01	γ-Linolenic Acid	-0.29	5.74	2.94	6.50528	6.37587	5.70333	4.36442	6.50756	5.23931	7.03787	4.22344	0.74711	3.16615	5.63251	0.106663	0.364119	3.79718	2.46146	7.24389

## Sheet: Sheet4
the DMs between COPD and BYF groups(in 32th week)
No.	Name	rt	m/z	VIP(BYF/COPD)	ttest_P	metabolite	fold(BYF/COPD)	COPD	BYF	COPD_F11	COPD_F123	COPD_F146	COPD_F19	COPD_F23	COPD_F87	COPD_F62	COPD_F144	BYF_F109	BYF_F96	BYF_F141	BYF_F25	BYF_F34	BYF_F71	BYF_F47	BYF_F98
458	M133T30	0.494	133.097	1.82	0.01	Ornithine	-0.33	0.07	0.03	0.124098	0.0517736	0.09459	0.0838172	0.0535145	0.0547581	0.0509323	0.0347852	0.0247788	0.0339794	0.0436832	0.0165067	0.0184434	0.0272218	0.0351292	0.0575009
2371	M131T33	0.557	131.033	1.08	0.02	Itaconic acid	-0.25	1.18	0.67	1.9572	1.03464	0.924404	0.823107	0.761467	1.30847	0.868397	1.76201	1.09755	1.02763	0.880146	0.501979	0.242854	0.619319	0.517519	0.47123
2382	M146T35	0.589	146.117	1.86	0.01	Acetylcholine	-0.49	0.15	0.05	0.0137755	0.131825	0.193717	0.138239	0.11125	0.303318	0.112053	0.233857	0.00799715	0.0206099	0.00590709	0.106583	0.0393798	0.101369	0.0803598	0.037163
1567	M205T35	0.59	205.082	1.46	0.04	γ-D-Glutamylglycine	-0.3	0.07	0.03	0	0.0670968	0.0943176	0.0901988	0.0146293	0.101164	0.0714515	0.0914661	0.039241	0.0435276	0.0132935	0.0312547	0.00468537	0.043007	0.0480237	0.0455584
2147	M244T36	0.606	244.092	1.3	0	Cytidine	-0.34	8.26	3.8	5.20436	8.33256	9.68262	7.02896	5.35139	15.1036	4.67082	10.6929	4.22351	4.34792	3.56579	4.15832	1.47964	5.32456	3.81441	3.50223
1317	M112T39	0.645	112.051	1.79	0.01	Cytosine	-0.42	1.35	0.52	0.278503	1.6363	1.52441	1.80458	0.996206	1.78421	0.452342	2.33968	0.296677	0.7704	0.364215	0.653965	0.373697	0.833938	0.034544	0.826774
1868	M428T40	0.674	428.037	1.73	0.01	ADP	-0.33	0.58	0.27	1.17802	0.678253	0.290561	0.553642	0.529718	0.497168	0.31045	0.622836	0.469753	0.146183	0.0942295	0.367978	0.248589	0.31823	0.207155	0.321197
2553	M113T43	0.714	113.035	1.77	0.01	Uracil	-0.63	1.4	0.33	0.0975925	2.39389	2.4232	1.56245	0.783943	1.7923	0.0549076	2.0901	0.0630692	0.322783	0.275621	0.392581	0.251634	0.957223	0.302607	0.0727038
1311	M130T45	0.746	130.05	1.66	0.02	Pyroglutamic acid	-0.22	2.45	1.48	2.78727	2.62473	2.7662	3.09035	1.93215	0.936601	1.78108	3.70496	2.12534	1.98269	1.88673	0.978352	0.919306	1.79846	1.28004	0.897715
1021	M101T51	0.847	101.024	1.7	0.01	Succinic anhydride	-0.64	0.29	0.07	0	0.114231	0.524712	0.261835	0.29648	0.646488	0.126415	0.346126	0	0.0100428	0.024625	0.0608127	0.0656186	0.17045	0.0677727	0.132186
211	M232T141	2.348	232.154	1.65	0.02	Butyryl-L-carnitine	-0.46	0.5	0.17	0.531784	0.449831	0.379073	1.25433	0.260571	0.355204	0.319906	0.415776	0	0.0659489	0.0926826	0.209849	0.17687	0.366378	0.309568	0.149347
2620	M184T275	4.577	184.06	1.78	0.01	4-Pyridoxic acid	-0.42	0.05	0.02	0	0.0426079	0.081051	0.0534296	0.0608286	0.0675998	0.0580931	0.0572264	0	0	0	0.0407412	0.0230391	0.0426832	0.0368115	0.0175637
2175	M348T285	4.743	348.07	1.49	0.04	dGMP	-0.18	0.19	0.13	0.162393	0.194454	0.242423	0.245853	0.120524	0.227689	0.133345	0.18896	0.1947	0.207027	0.148656	0.0618222	0.0481281	0.106703	0.0803332	0.161927
2123	M117T292	4.867	117.091	1.84	0.01	Isocaproic acid	-0.41	0.11	0.04	0.148445	0.101398	0.00672501	0.0961961	0.170052	0.155414	0.108275	0.0880005	0	0.0796565	0.049358	0.0440841	0.0265064	0.0786434	0.0205725	0.0441024
589	M260T302	5.03	260.058	1.54	0.03	D-Glucosamine 6-phosphate	1.19	0	0.07	0.00632245	0.0227831	0	0	0	0	0	0.00742433	0.130388	0.156195	0.155784	0	0	0	0	0.121943
1030	M208T310	5.159	208.096	1.65	0.02	N-Acetyl-L-phenylalanine	-0.45	0.03	0.01	0.0102513	0.0196738	0.0552701	0.00819483	0.0322364	0.0460057	0.035333	0.030631	0	0	0	0.0252499	0.0158385	0.0199232	0.0231318	0
2570	M89T321	5.356	89.0601	1.94	0	Butyric acid	-0.31	0.19	0.09	0.25196	0.214174	0.0902122	0.175465	0.236698	0.285262	0.0961044	0.190345	0.0837582	0.0859956	0.121993	0.0890108	0.0595351	0.163012	0.0510525	0.102567
2221	M365T375	6.255	365.271	1.57	0.03	Prostaglandin A1 ethyl ester	#DIV/0!	0	0.02	0	0	0	0	0	0	0	0	0	0	0	0.0621967	0.0504703	0.030503	0.0426901	0
2158	M476T445	7.413	476.265	1.56	0.03	LysoPE(18:3)	-0.24	0.29	0.17	0.164286	0.350673	0.325521	0.360512	0.111358	0.420152	0.195364	0.419303	0.192948	0.165234	0.22255	0.134811	0.0316401	0.187703	0.10956	0.298845
2263	M415T446_2	7.429	415.399	1.46	0.04	β-Sitosterol	0.44	0.1	0.29	0.0484181	0.0607297	0.0516784	0.0831507	0.192774	0.0525225	0.326748	0.0174839	0.46009	0.560595	0.452126	0.107864	0.0748952	0.0383285	0.195913	0.423004
1976	M297T455	7.578	297.24	1.6	0.02	9-HODE	#DIV/0!	0	0.02	0	0	0	0	0	0	0	0	0	0	0	0.0457588	0.0287541	0.0372471	0.0418064	0
406	M302T475	7.917	302.306	1.5	0.03	Sphinganine	0.52	0.1	0.33	0.279013	0.0798549	0.0518678	0.0169156	0.0969585	0.0613055	0.15176	0.0643912	0.121808	0.133687	0.261953	0.430543	0.907672	0.372631	0.308547	0.096558
820	M319T482	8.038	319.227	1.56	0.03	Leukotriene A4	-0.49	0.3	0.1	0	0.189196	0.316439	0.642197	0.426145	0.309185	0.32879	0.159209	0	0	0	0.101251	0.117889	0.203241	0.342333	0
2129	M321T502	8.371	321.242	2.09	0	5-HETE	-0.62	0.08	0.02	0	0.0804768	0.0842463	0.108164	0.0928049	0.0773983	0.120552	0.0983241	0	0	0	0.0352056	0.0454945	0.0220982	0.056965	0
1008	M468T517	8.615	468.309	1.8	0.01	PC(14:0)	0.22	0.69	1.13	0	0.798545	0.785814	0.653704	0.7486	0.832954	0.894885	0.792239	1.32216	1.10851	1.05396	1.17698	1.47555	0.894361	0.609355	1.40445
1862	M522T666	11.102	522.356	1.75	0.01	PC(18:1)	0.38	1.3	3.08	1.10174	0.66678	1.56157	0.978691	1.36747	1.64358	1.53796	1.51829	1.69362	1.8086	1.99456	4.43448	6.27071	4.11838	2.2519	2.06666
588	M314T703	11.724	314.277	1.39	0.03	N-Palmitoyl Glycine	0.44	0.19	0.52	0.141953	0.0737221	0.0662	0.0891309	0.321807	0.105446	0.60447	0.0975947	0.08603	0.148258	0.716473	0.748661	0.89617	0.809441	0.707374	0.0599525
200	M674T710	11.833	674.463	1.59	0.02	PC(28:2)	1.62	0	0.19	0.0355354	0	0	0	0	0	0	0	0.377883	0.426042	0.359982	0	0	0	0	0.316527
210	M331T712	11.874	331.264	1.45	0.04	Eicosapentaenoic Acid ethyl ester	0.24	0.1	0.18	0.207536	0.0744665	0.0431788	0.0519264	0.0630857	0.0555959	0.230147	0.0891949	0.13244	0.146713	0.26009	0.116393	0.262029	0.146238	0.196996	0.146283
579	M340T718	11.962	340.293	1.49	0.04	N-hexadecanoyl-L-Homoserine lactone	1.12	0	0.05	0	0	0	0	0	0	0.032044	0	0	0	0.0198262	0.0894395	0.160561	0.0746236	0.0743157	0
1134	M305T752	12.531	305.245	1.36	0.02	Arachidonic Acid	-0.31	0.12	0.04	0.0349048	0.244274	0.114203	0.0562341	0.252624	0.0801632	0.132882	0.231033	0.143618	0	0.0126324	0	0.0513235	0.0701378	0.0648862	0.0241203
291	M382T773	12.885	382.301	1.62	0.02	PGF2α ethyl amide	#DIV/0!	0	0.04	0	0	0	0	0	0	0	0	0	0	0.0851726	0.0774049	0.0859031	0.0704376	0	0
